# Supplementary material for: The structure and morphology of the Basse Terre Island, Lesser Antilles volcanic arc
Source: Springer Nature journal article supplement (doi:10.1007/s00445-013-0700-y), 2013-03-01
Supplement: 445_2013_700_MOESM1_ESM.pdf [file 445_2013_700_MOESM1_ESM.pdf]

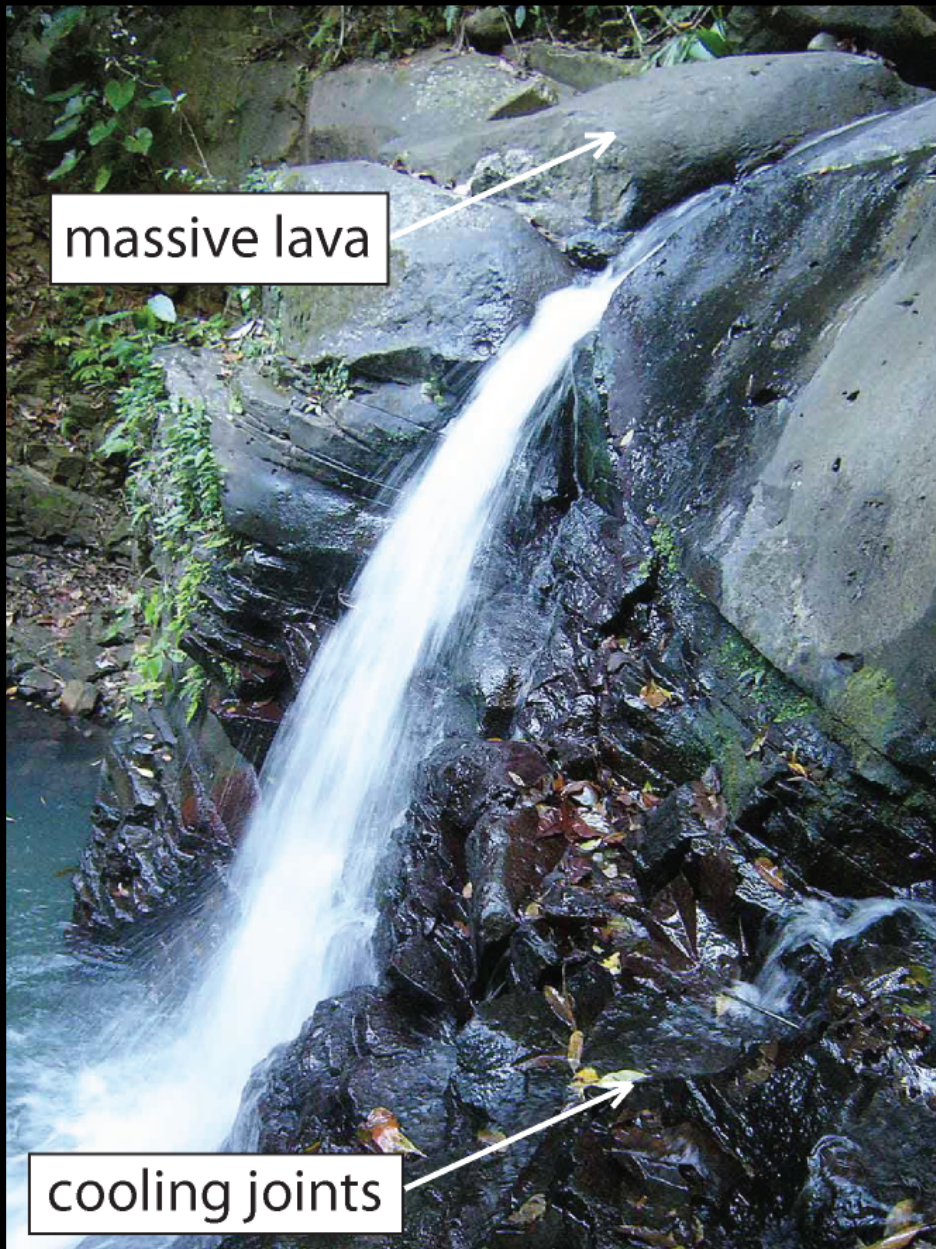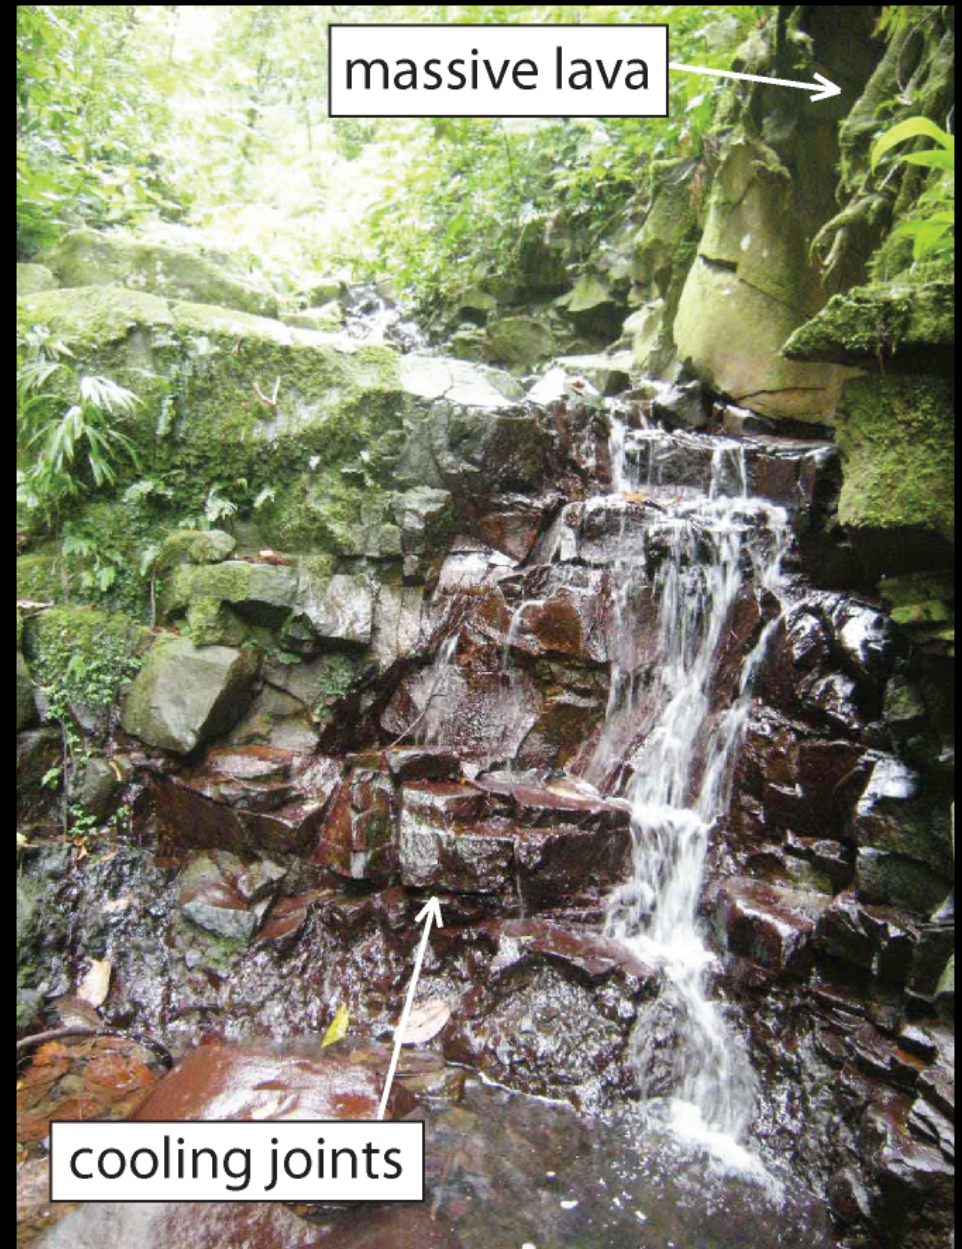

Pictures of massive lava flows with sub-horizontal cooling joints; the waterfalls are 5 m height.

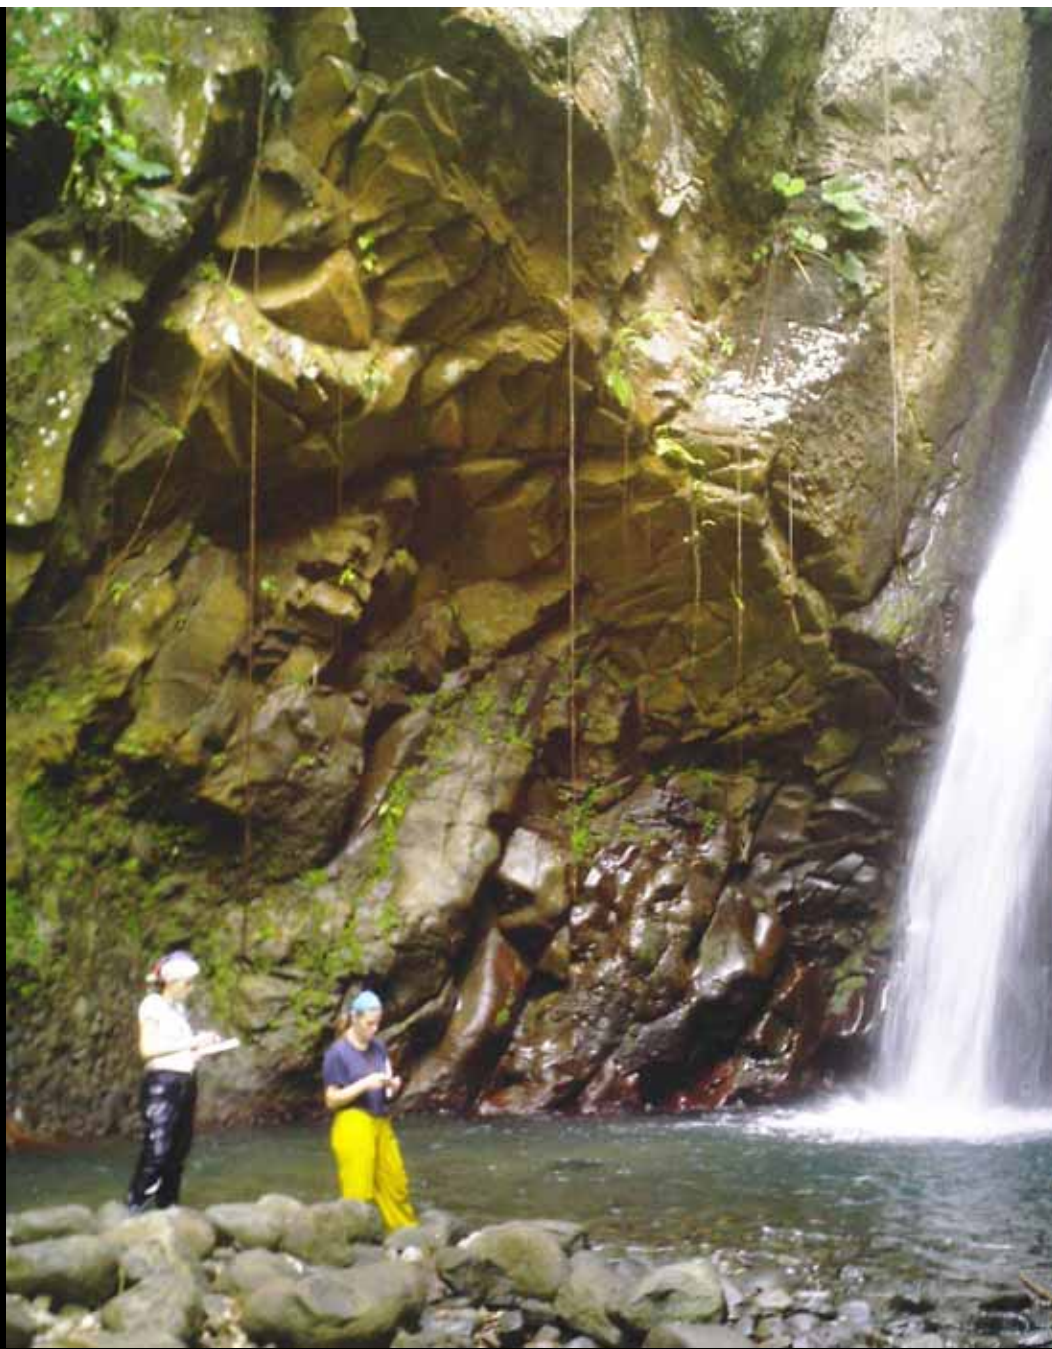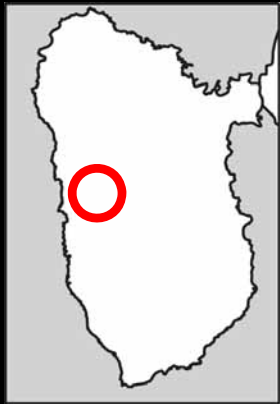

Pictures of west-dipping lava flow outcropping in the Bourceau River, north-western Axial Chain

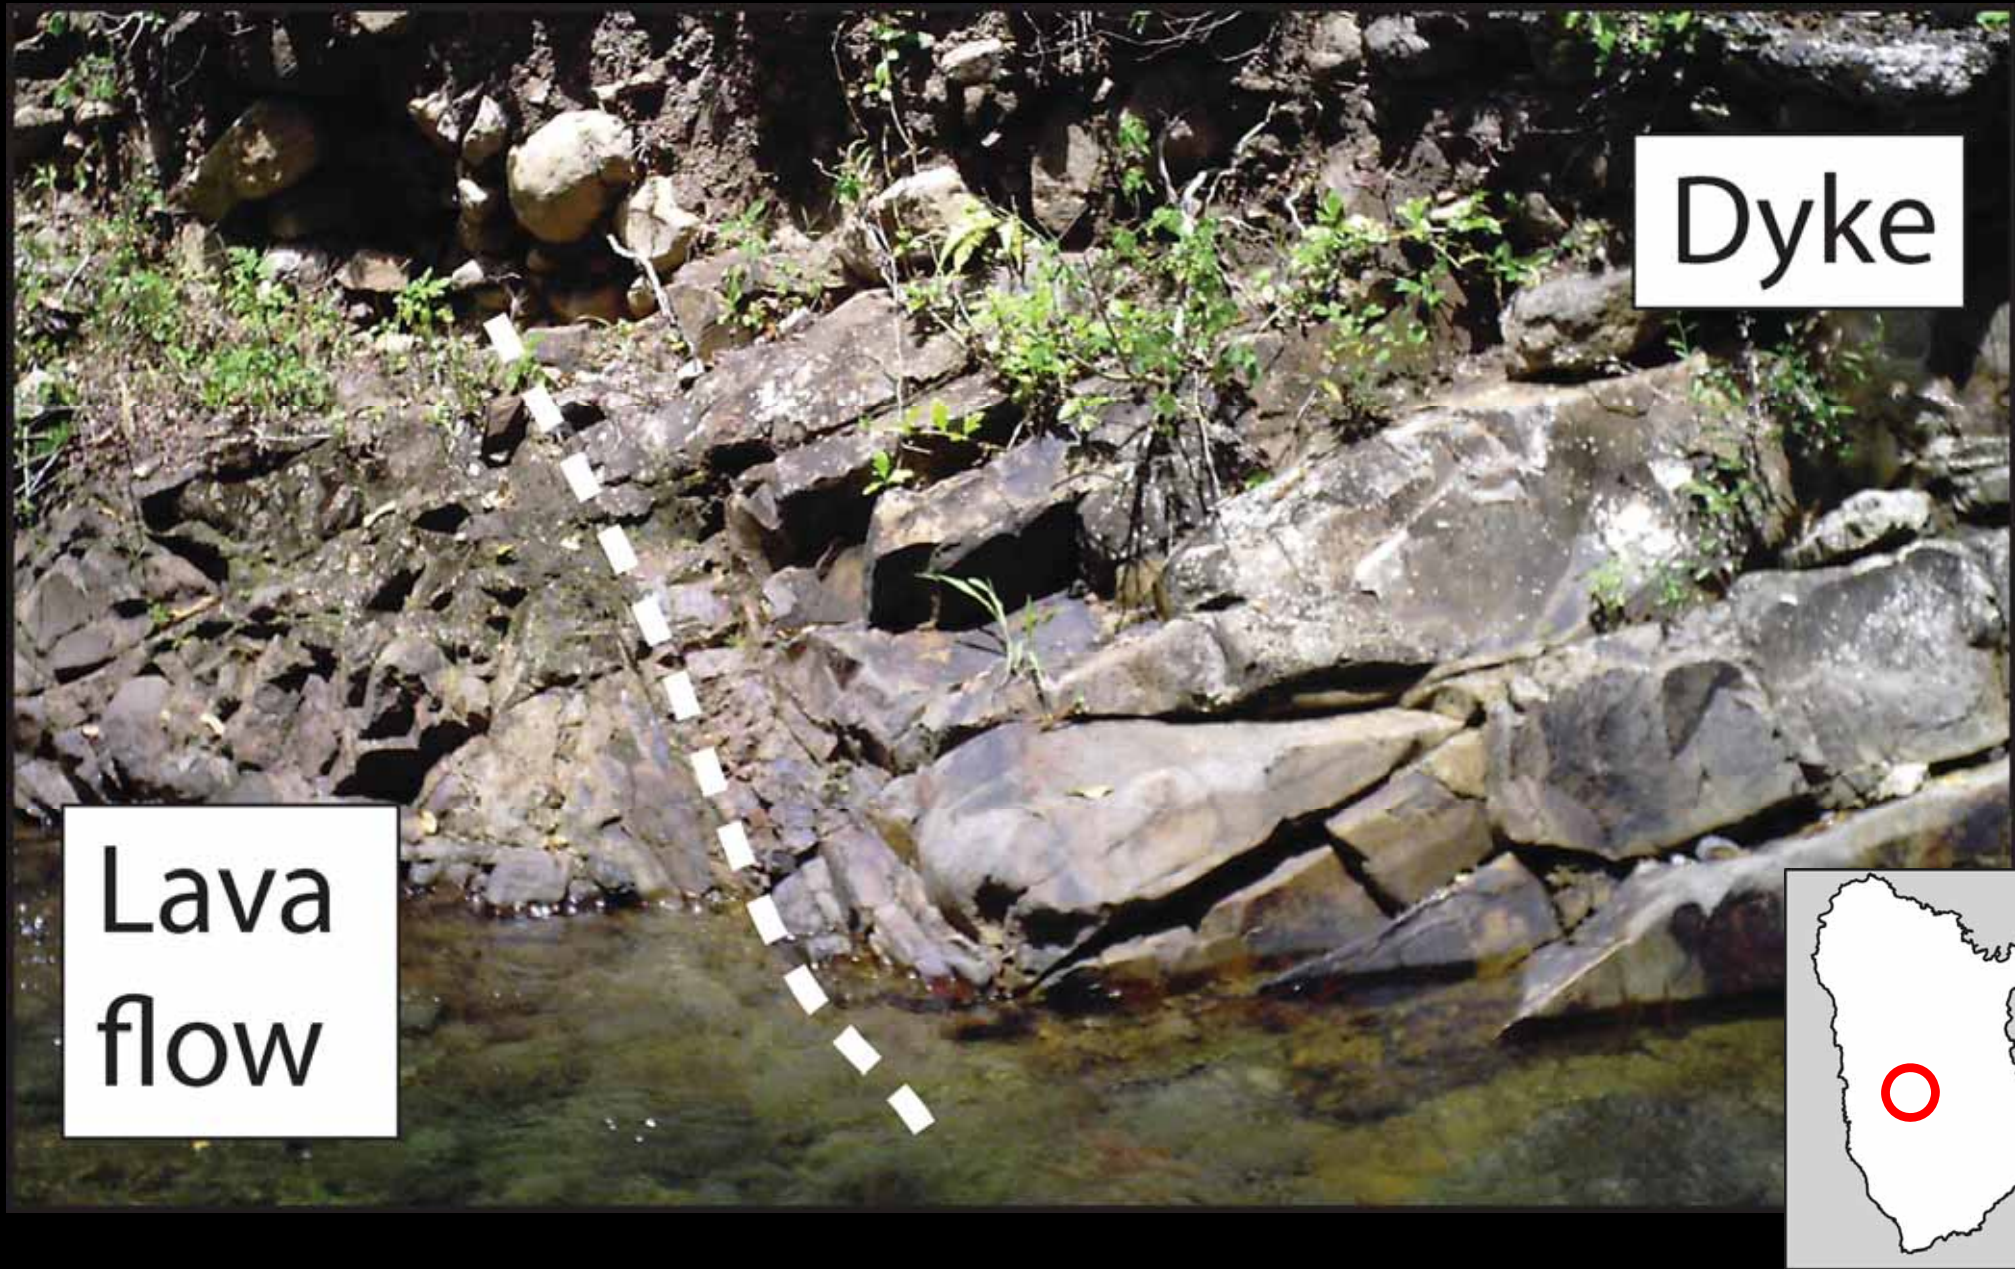

Picture of a two meters thick dyke located in the Beaugendre River.

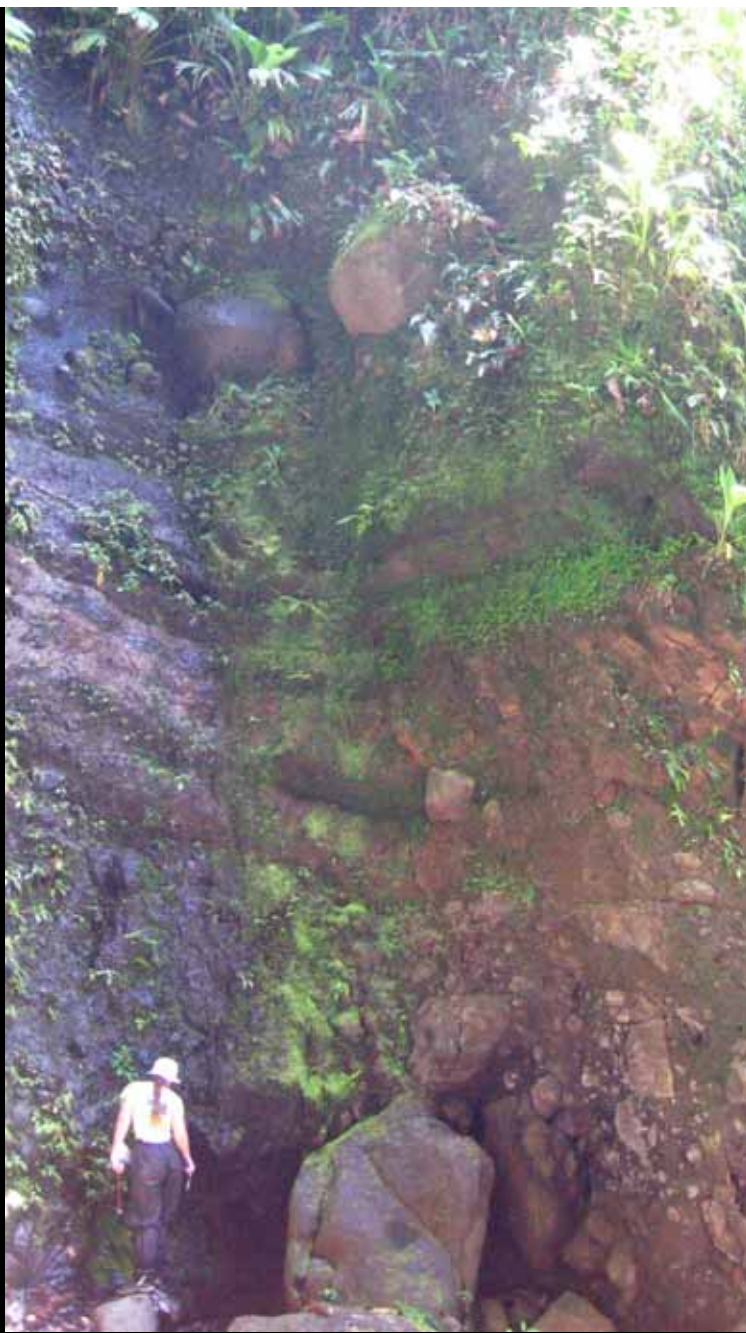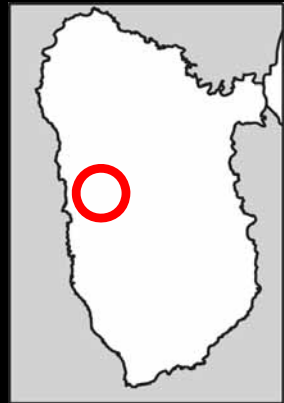

Picture of debris flow and lahars deposits located in Espérance River, north-western Axial Chain.

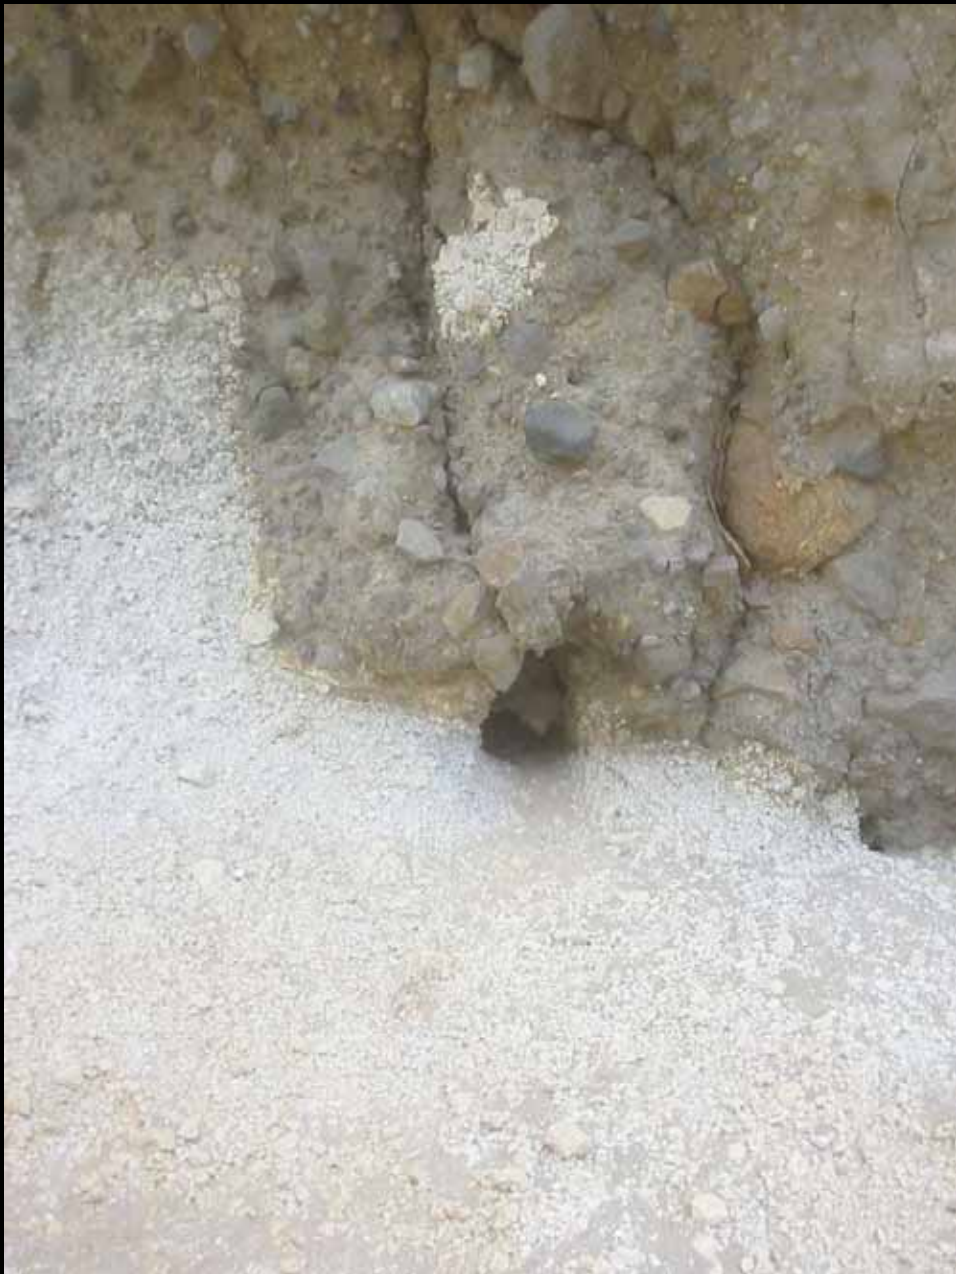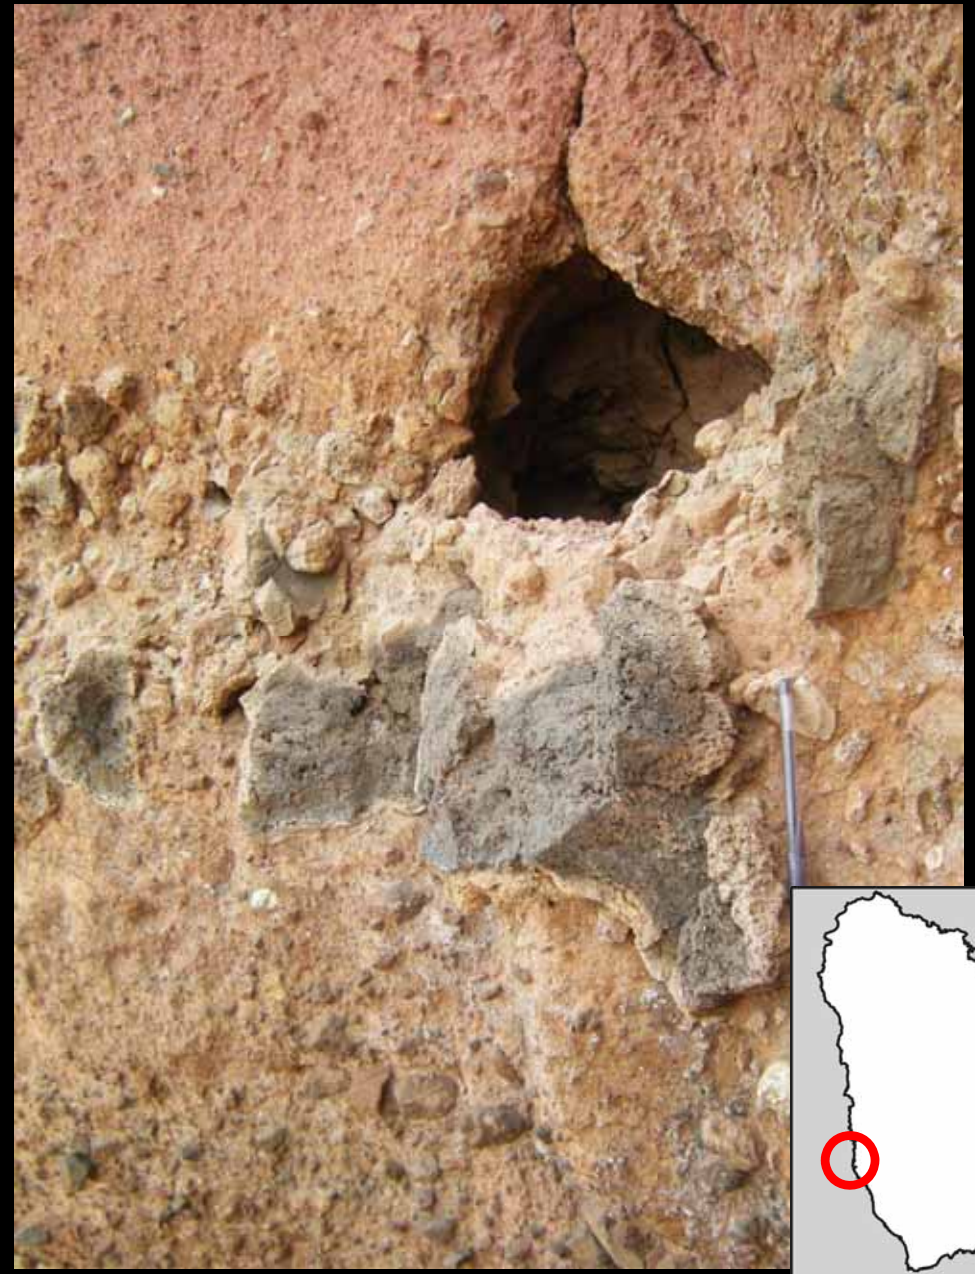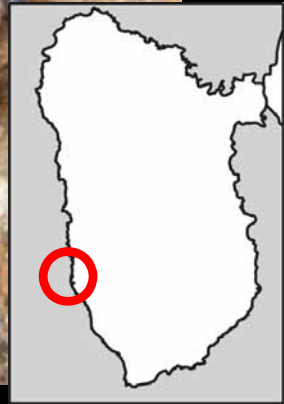

Pictures of pumice-rich debris flow deposits located near the Rocroy beach, along the western shore line of Basse Terre.

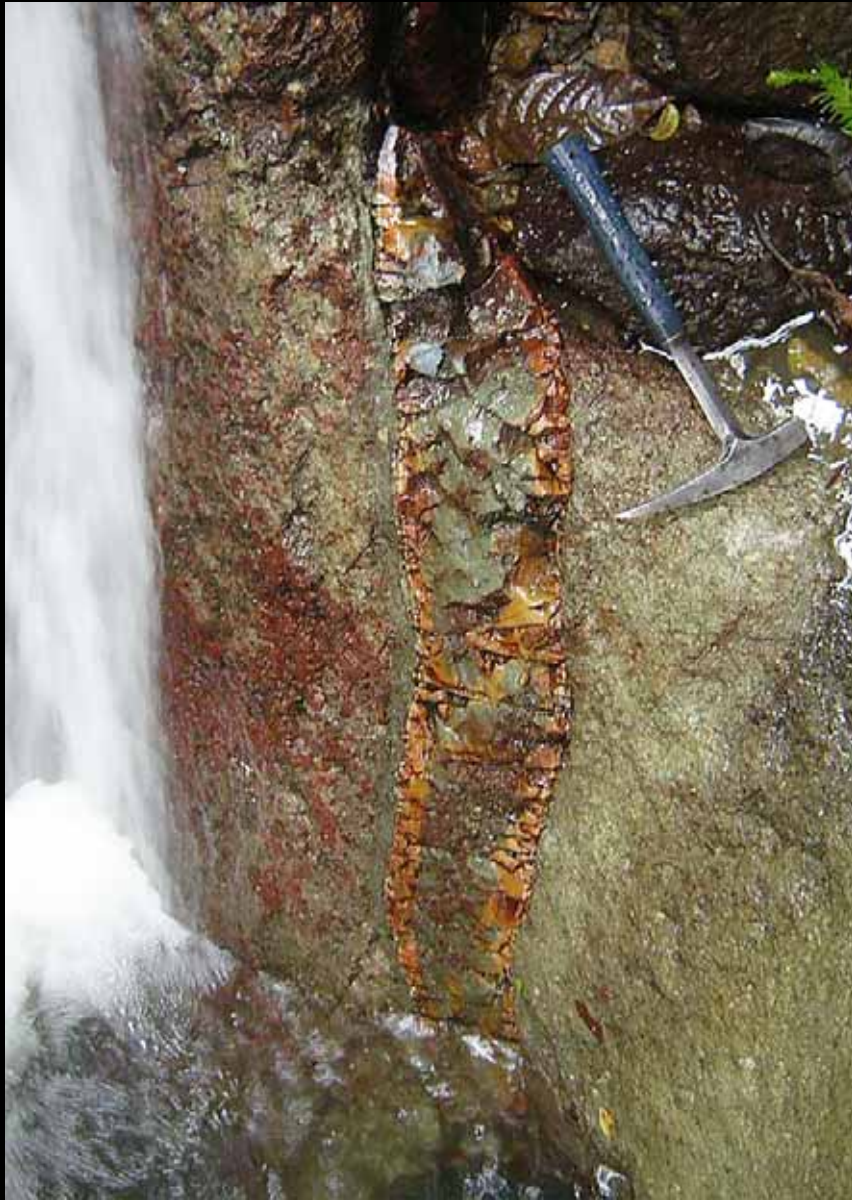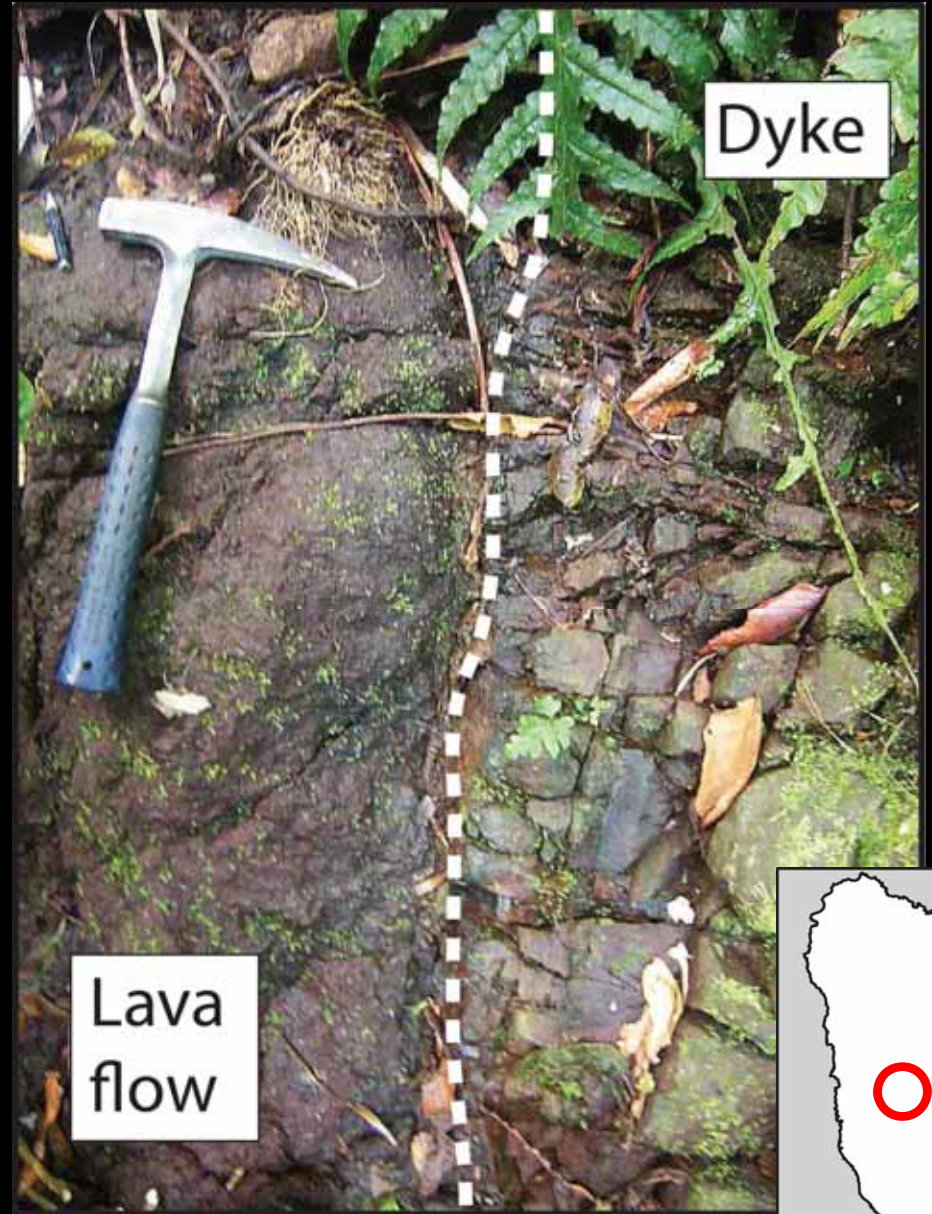

Lava  
flow

Dyke

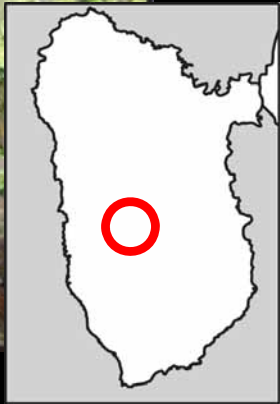

Pictures of a 0.5m and of a 1m thick dykes located in the Beaugendre valley.

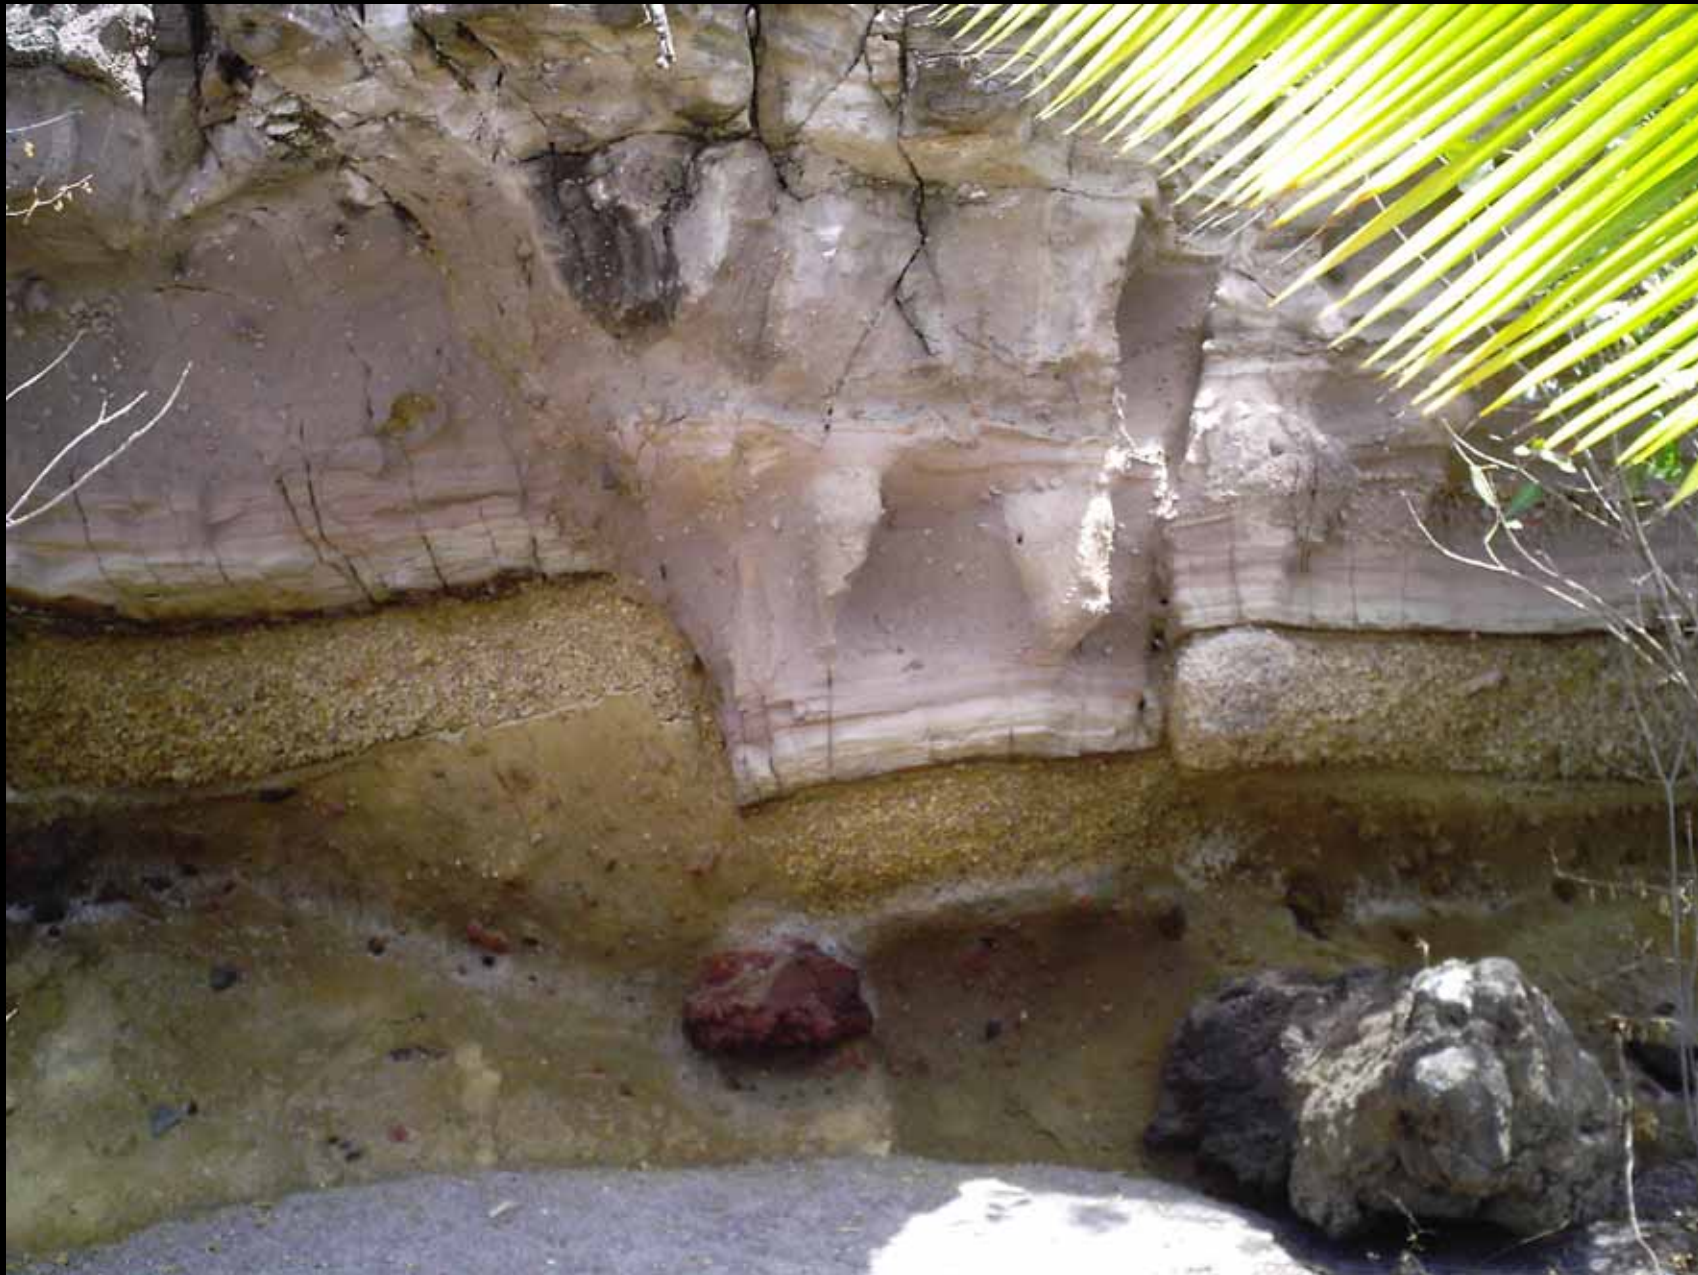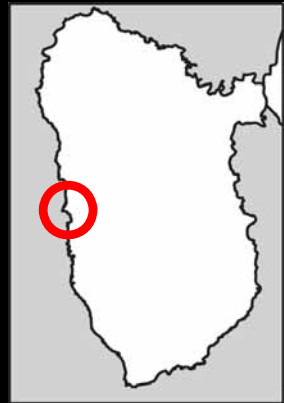

Picture of normal faults located in the clastic deposits of the Pigeon deposit.

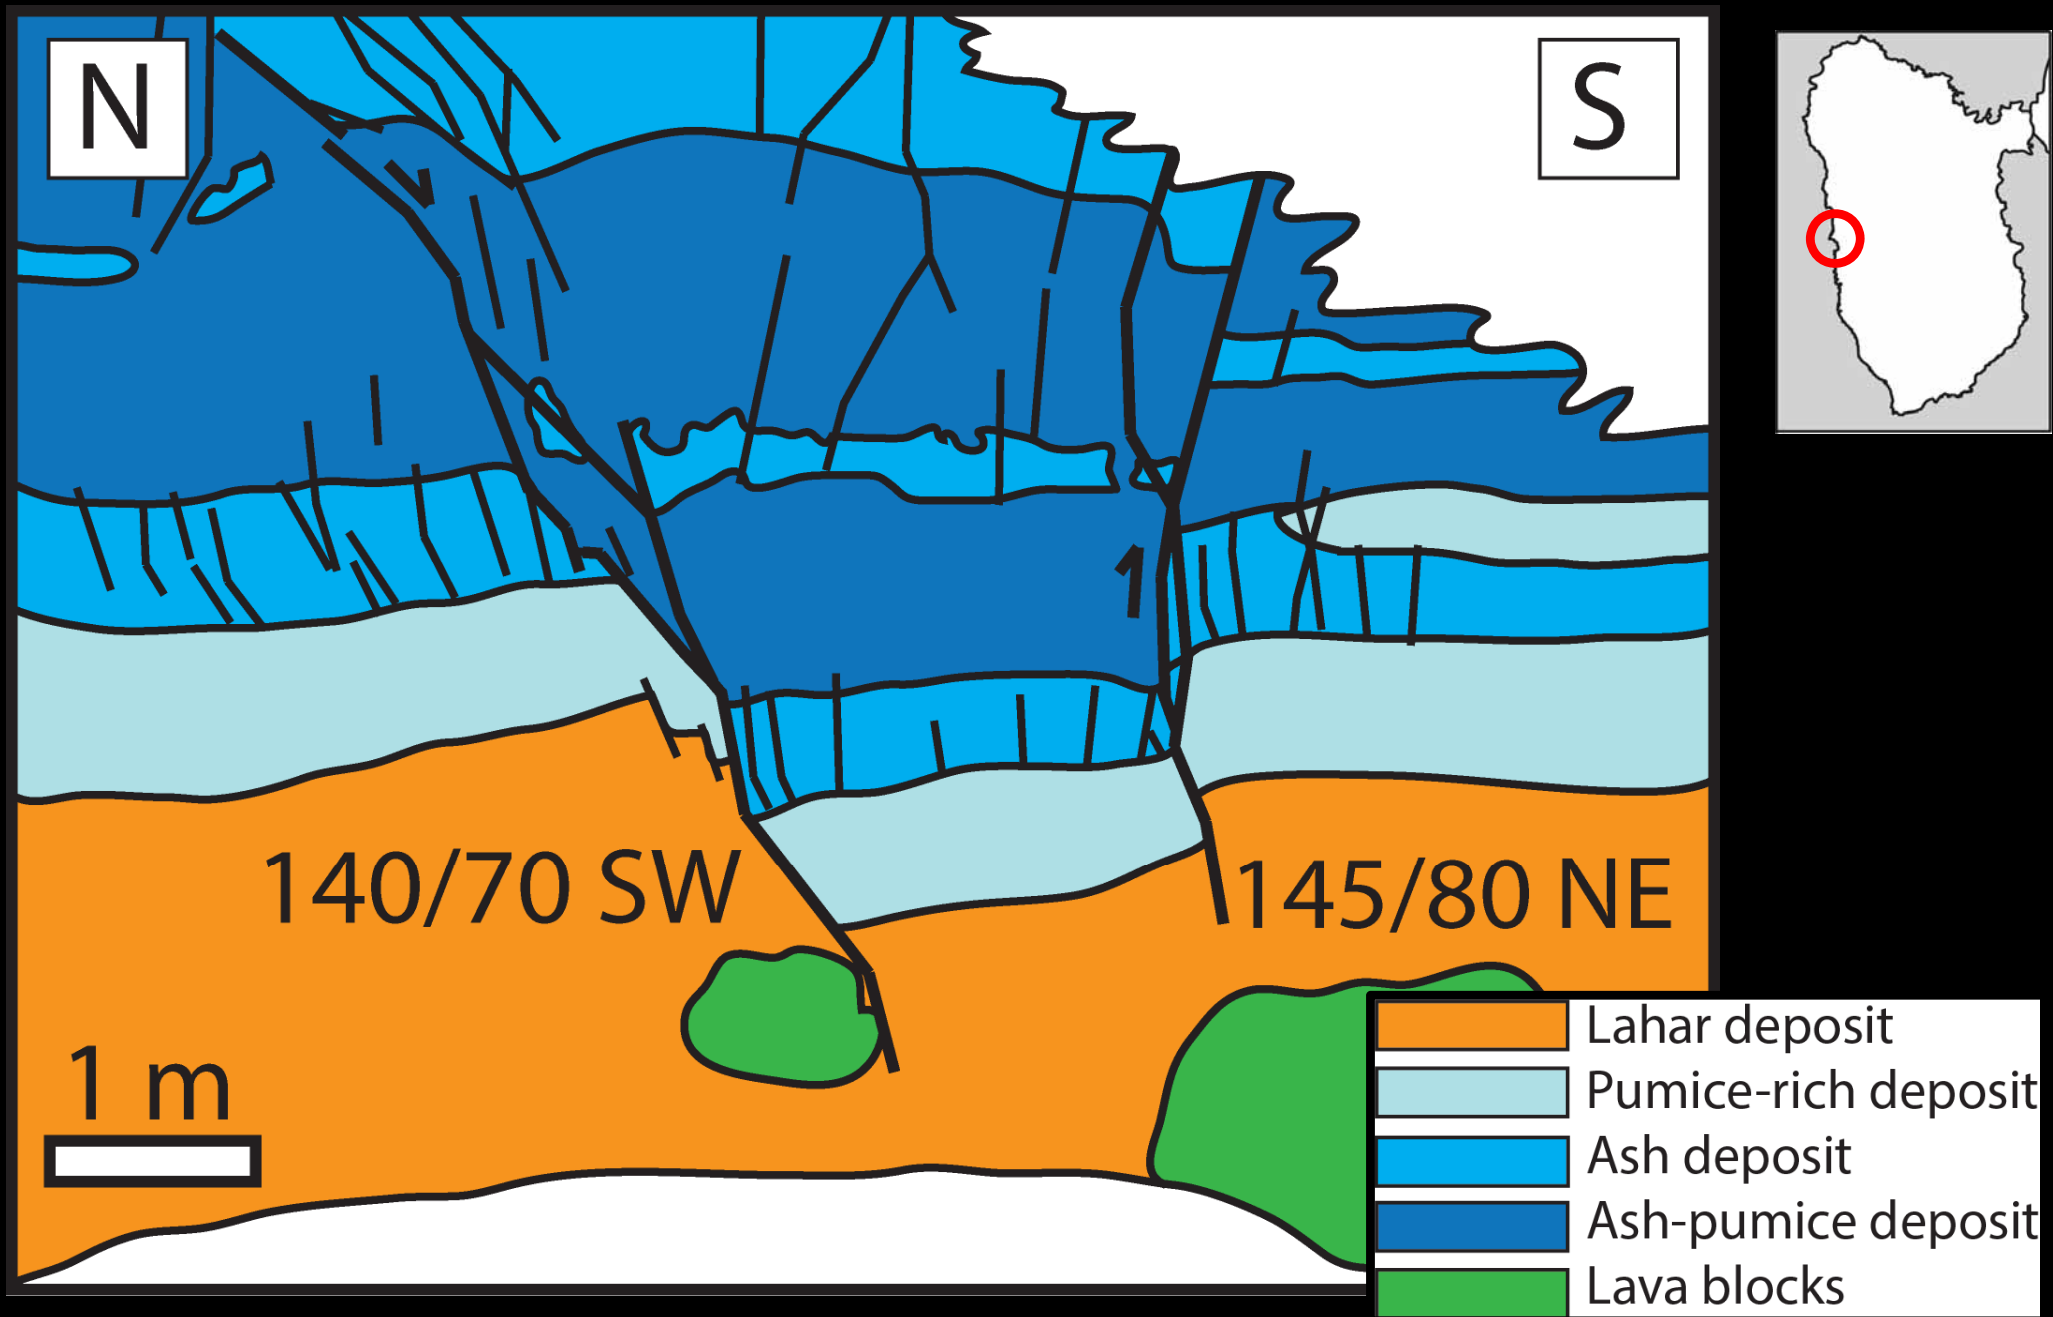

Sketch of normal faults located in the clastic deposits of the Pigeon deposit.



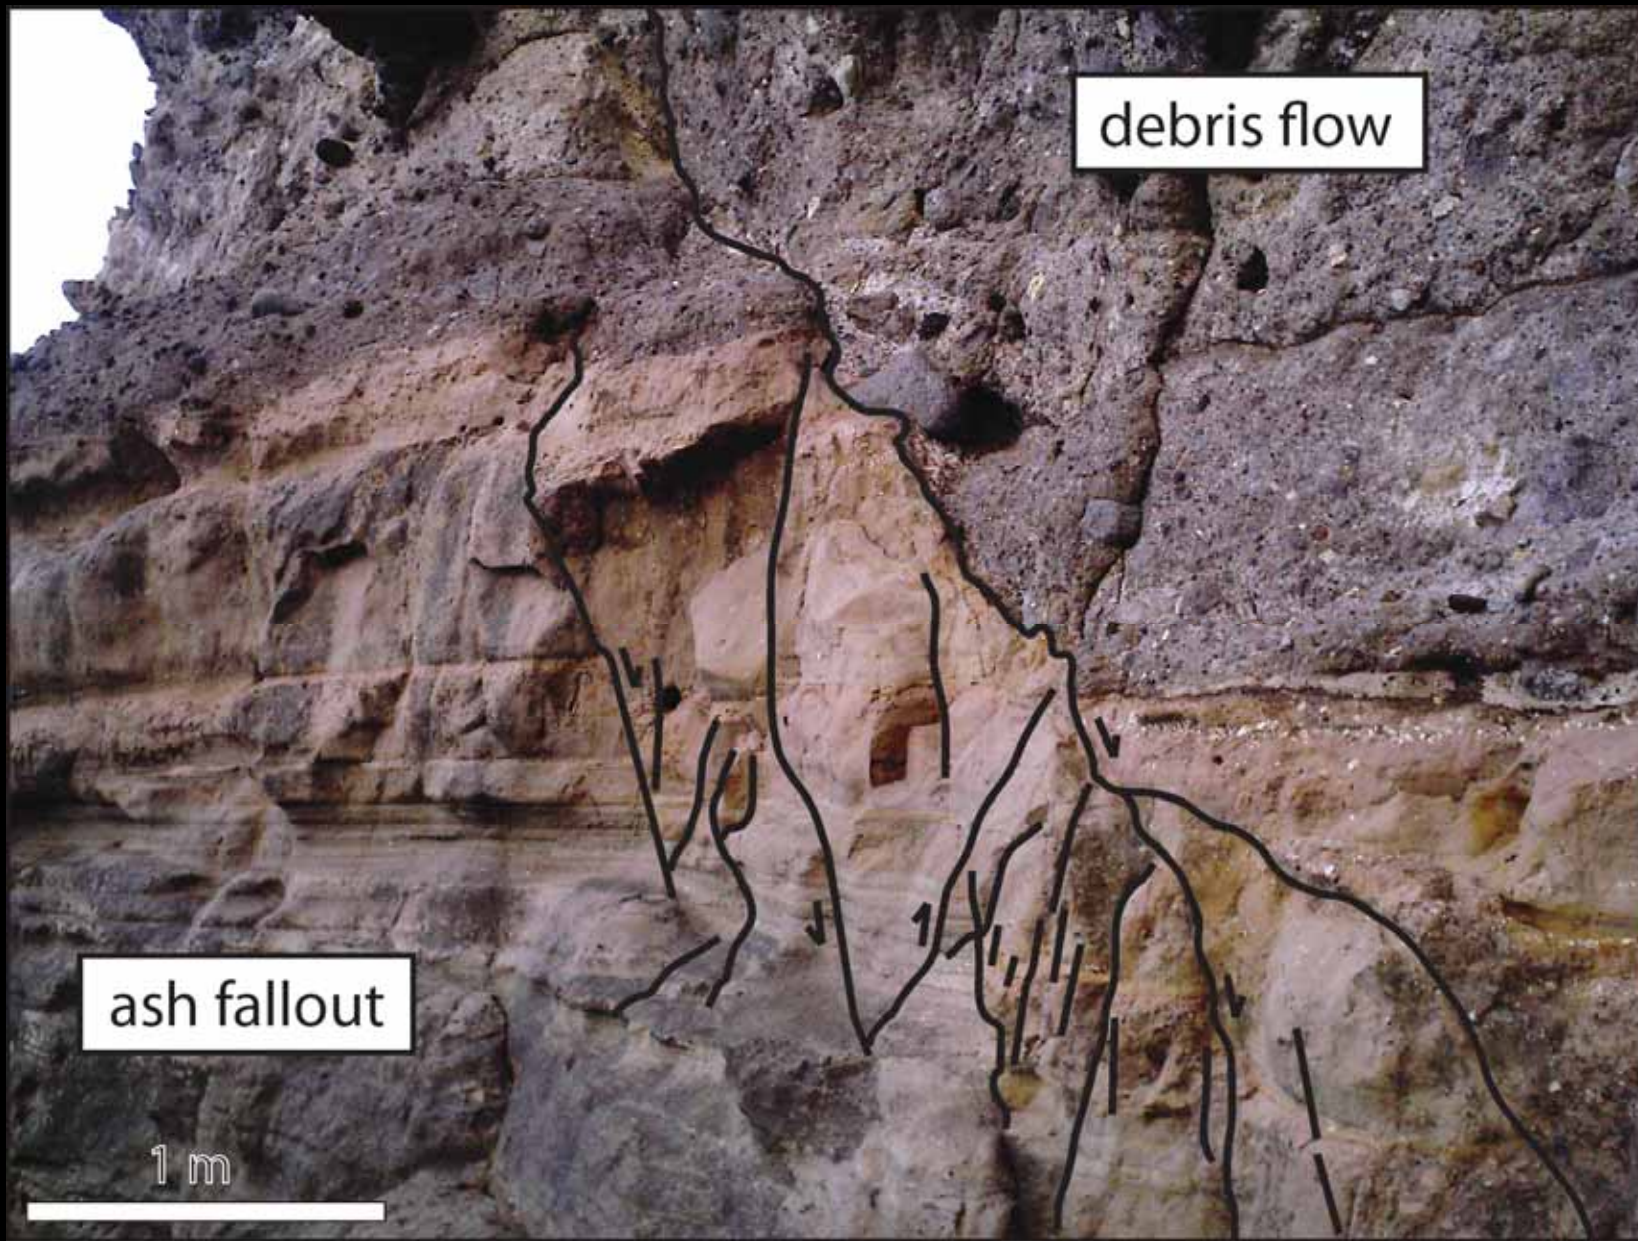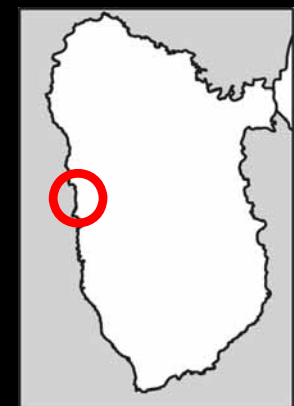

Picture of normal faults located in the clastic deposits of the Malendure deposit.

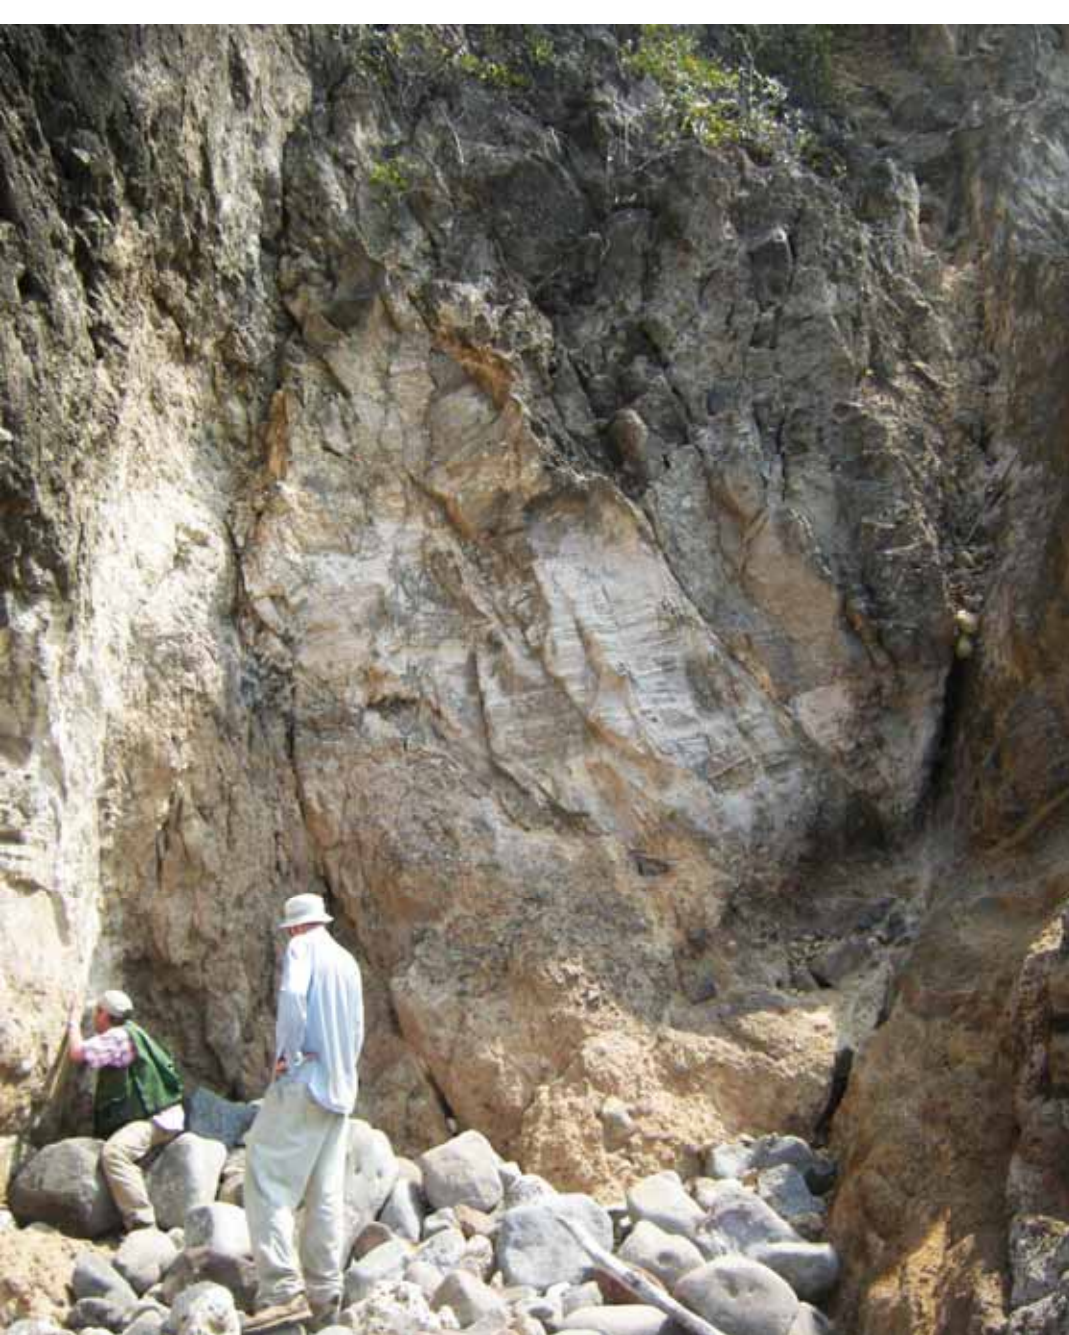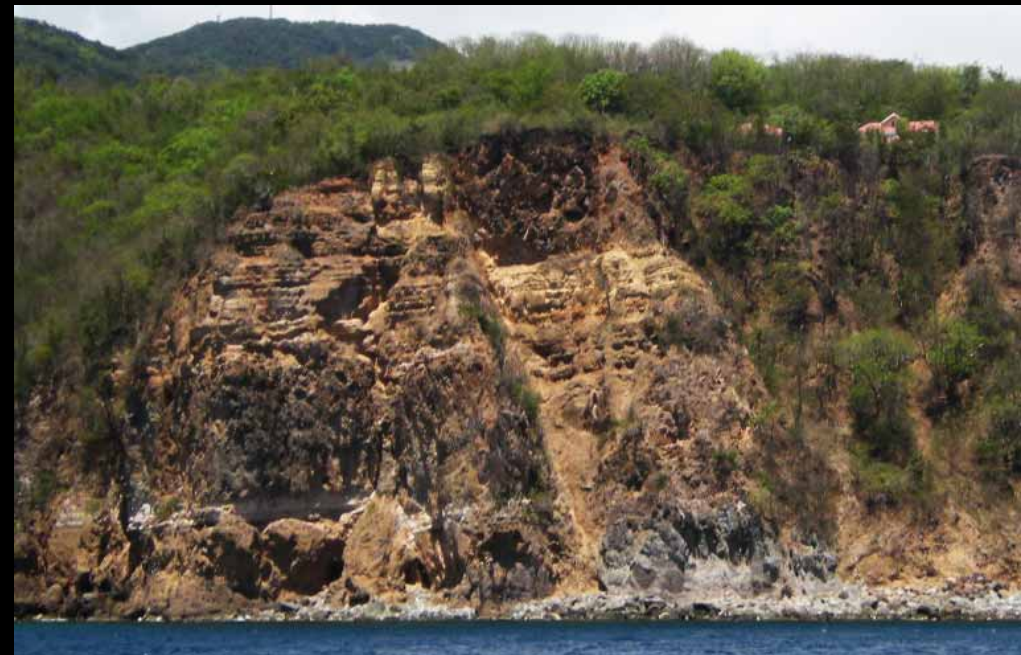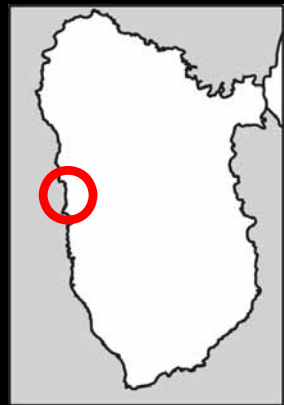

Pictures of normal faults located in the clastic deposits of the Malendure deposit.

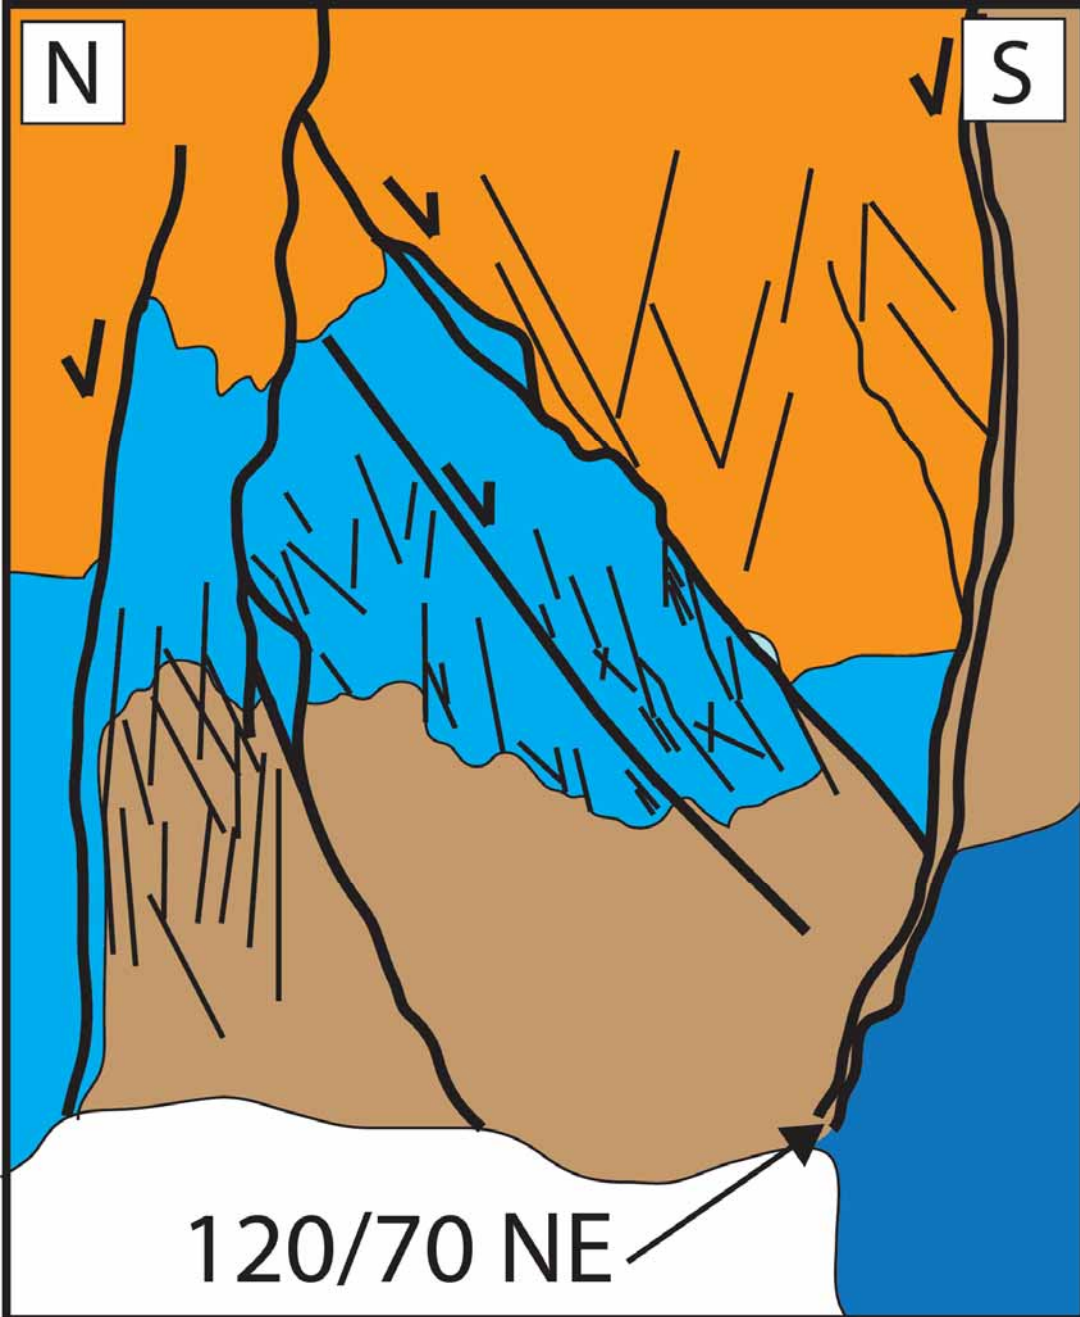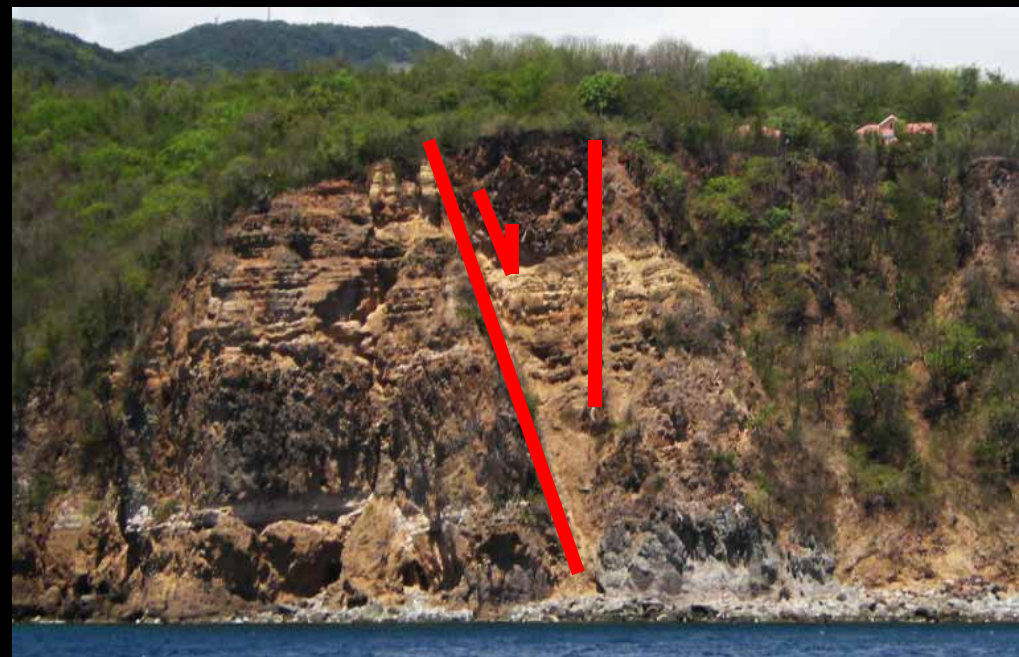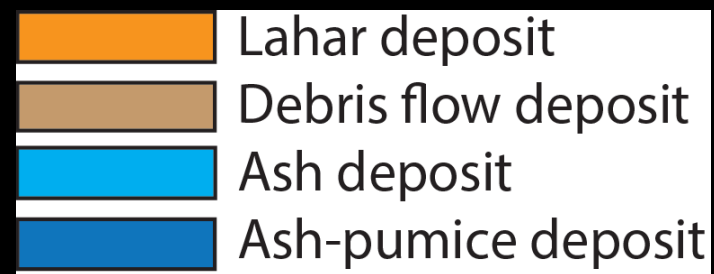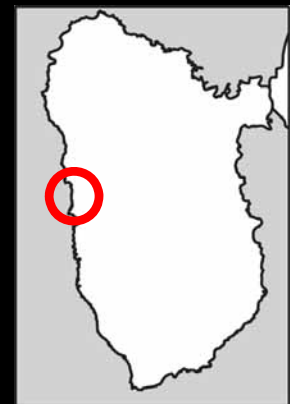

Picture and sketch of normal faults located in the clastic deposits of the Malendure deposit.
